# Supplementary material
Source: Springer Nature journal article supplement (https://www.springermedizin.de/resource/supplementary/12885_2009_2090_MOESM12_ESM.pdf/9460502)

**A**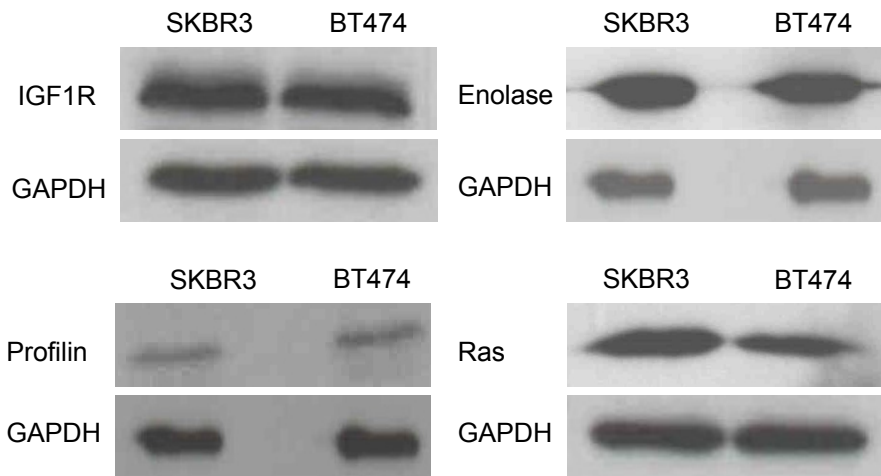**B**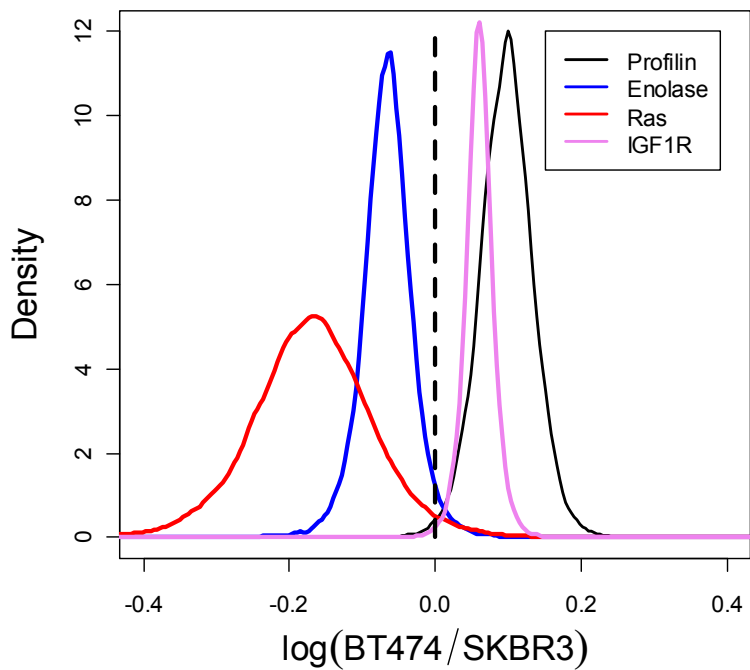

Supplement: MOESM12 [file 9460502]
